# Supplementary material for: An Emerging Allee Effect Is Critical for Tumor Initiation and Persistence
Source: PubMed Central journal article supplement (PMC4559422; doi:10.1371/journal.pcbi.1004366), 2015-09-03

(a)

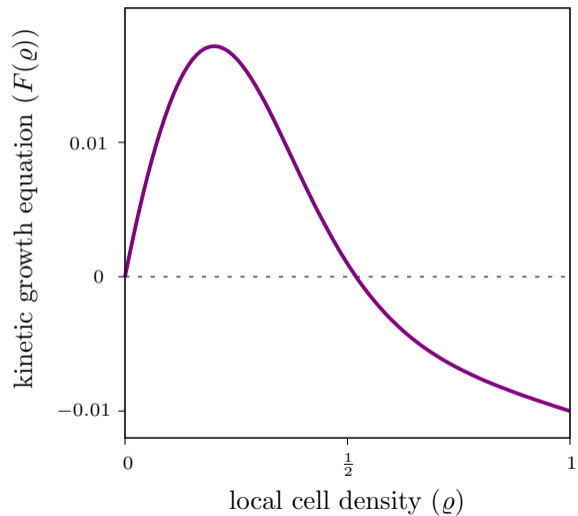

(b)

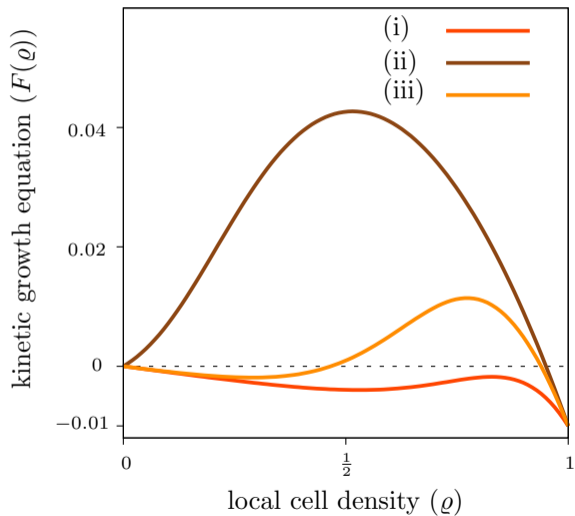

Supplement: pcbi.1004366.s002.pdf [file pcbi.1004366.s002.pdf]
